# Supplementary material for: Biochemical validation of a second class of tetrahydrofolate riboswitches in bacteria
Source: PubMed Central journal article supplement (PMC6800512; doi:10.1261/rna.071829.119), 2019-09
Supplement: supp_071829.119_Supplemental_Information.pdf [file supp_071829.119_Supplemental_Information.pdf]

## Supplemental Information

# Biochemical validation of a second class of tetrahydrofolate riboswitches in bacteria

**XI CHEN,<sup>1,4</sup> GAYAN MIRIHANA ARACHCHILAGE,<sup>2,4</sup> AND RONALD R. BREAKER<sup>1,2,3</sup>**

<sup>1</sup>Department of Molecular Biophysics and Biochemistry, Yale University, New Haven, Connecticut 06520-8103, USA

<sup>2</sup>Howard Hughes Medical Institute, Yale University, New Haven, Connecticut 06520-8103, USA

<sup>3</sup>Department of Molecular, Cellular and Developmental Biology, Yale University, New Haven, Connecticut 06520-8103, USA

<sup>4</sup>These authors contributed equally to this work.

Corresponding author: [ronald.breaker@yale.edu](mailto:ronald.breaker@yale.edu)

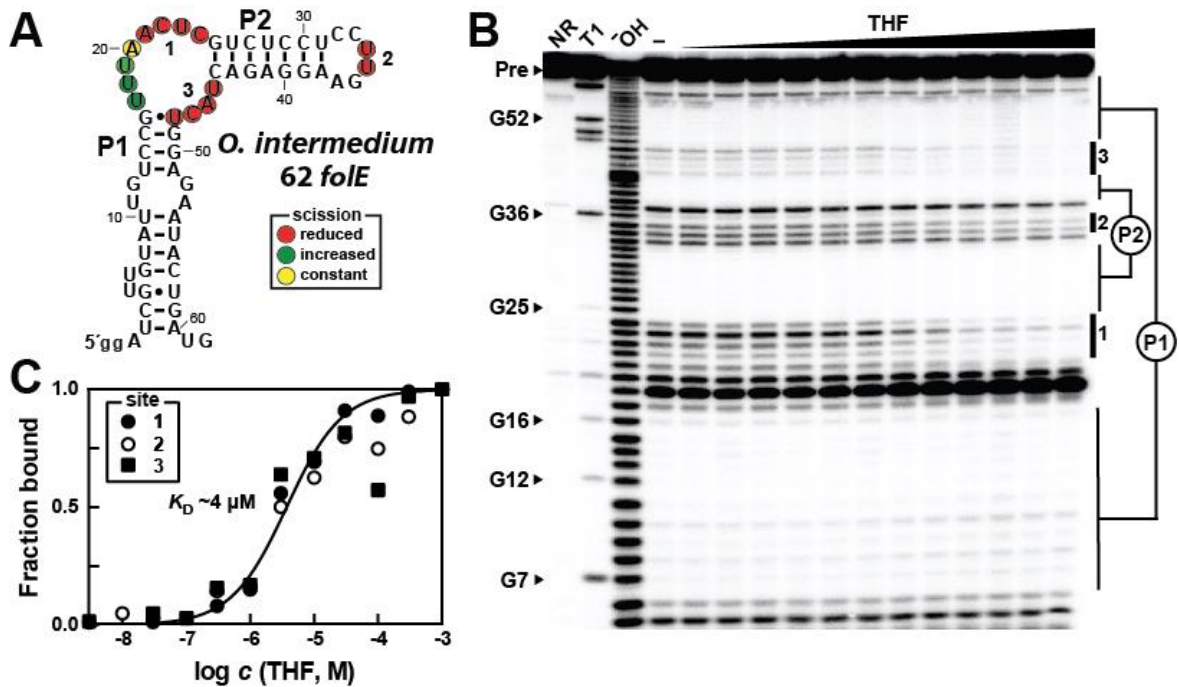

**FIGURE S1.** THF binding by the 62 *folE* RNA construct derived from *Ochrobactrum intermedium*. (A) Sequence and secondary structure model of the *O. intermedium* 62 *folE* RNA construct. Additional notations are as described in the legend to **Fig. 2A**. (B) PAGE analysis of the *O. intermedium* 62 *folE* RNA subjected to in-line probing assays in the absence (–) or presence of THF concentrations ranging from 10 nM to 1 mM. Additional annotations are as described in the legend to **Fig. 2B**. (C) Plot of fraction of RNA bound to THF versus the logarithm of the molar concentration of THF. The data is derived from B. Additional annotations are as described in the legend to **Fig. 2C**.

**Supplemental Table S1.** Sequences of synthetic DNAs used in this study.

| Name  | Sequence (5' to 3')                                                                               | Annotation                                                                 |
|-------|---------------------------------------------------------------------------------------------------|----------------------------------------------------------------------------|
| folE1 | CATAAAGGCGTCTCCCGTA<br>GTTCTCTCGAGGAGGAAC<br>GAGTTGAACGGACCACGA<br>CCTTTCCTATAGTGAGTCG<br>TATTA   | The template for transcription of <i>M. loti</i> 62 <i>folE</i> RNA        |
| folE2 | CATAAAGGCGTCTCCCGTA<br>GTTCTCTCGAGGAGGAAC<br>GAGTTGTACGGACCACGAC<br>CCTTTCCTATAGTGAGTCGT<br>ATTA  | The template for transcription of M1 <i>M. loti</i> 62 <i>folE</i> RNA     |
| folE3 | CATAAAGGCGTCTCCCGTA<br>GTTCTCTCGAGGAGGAAC<br>GACTTGAACGGACCACGAC<br>CCTTTCCTATAGTGAGTCGT<br>ATTA  | The template for transcription of M2 <i>M. loti</i> 62 <i>folE</i> RNA     |
| folE4 | CATAAAGGCGTCTCCCGCA<br>GTTCTCTCGAGGAGGAAC<br>GAGTTGAACGGACCACGA<br>CCTTTCCTATAGTGAGTCG<br>TATTA   | The template for transcription of M3 <i>M. loti</i> 62 <i>folE</i> RNA     |
| folE5 | CATCAGTATTCTCCAGTAG<br>TCTCCTTCAAGGAGGAGAC<br>GAGTTAAACGGACAATAC<br>AACGATCCTATAGTGAGTC<br>GTATTA | The template for transcription of <i>O. intermedium</i> 62 <i>folE</i> RNA |
